# Supplementary material for: Quantifying and reducing spurious alignments for the analysis of ultra-short ancient DNA sequences
Source: PubMed Central journal article supplement (PMC6202837; doi:10.1186/s12915-018-0581-9), 2018-10-25
Supplement: 12915_2018_581_MOESM1_ESM.pdf [file 12915_2018_581_MOESM1_ESM.pdf]

**Supplementary Information:**

**Quantifying and reducing spurious alignments for the analysis of  
ultra-short ancient DNA sequences**

Cesare de Filippo<sup>1,\*</sup>, Matthias Meyer<sup>1</sup>, Kay Prüfer<sup>1,\*</sup>

<sup>1</sup> Max Planck Institute for Evolutionary Anthropology, Leipzig, Germany

\* Corresponding e-mail: cesare\_filippo(at)eva.mpg.de, pruefer(at)eva.mpg.de

**Table S1. Summary of bacterial sequences.**

| Length | All unique seq. | Mapped (%) | Classified spurious (%) | Spurious expected (%) ¶ |
|--------|-----------------|------------|-------------------------|-------------------------|
| 20     | 143,050,589     | 91.362     | 98.10                   | 96.67                   |
| 21     | 143,305,294     | 76.659     | 98.18                   | 96.83                   |
| 22     | 143,476,993     | 96.892     | 97.59                   | 95.45                   |
| 23     | 143,633,334     | 89.772     | 97.63                   | 95.65                   |
| 24     | 143,767,397     | 73.932     | 97.50                   | 95.83                   |
| 25     | 143,881,911     | 52.541     | 97.35                   | 96.00                   |
| 26     | 143,993,048     | 32.013     | 97.29                   | 96.15                   |
| 27     | 144,098,076     | 16.993     | 97.28                   | 96.30                   |
| 28     | 144,191,391     | 8.126      | 97.26                   | 96.43                   |
| 29     | 144,289,373     | 3.598      | 97.23                   | 96.55                   |
| 30     | 144,376,099     | 1.515      | 97.16                   | 96.67                   |
| 31     | 144,458,818     | 0.622      | 97.09                   | 96.77                   |
| 32     | 144,535,683     | 0.255      | 96.90                   | 96.88                   |
| 33     | 144,614,643     | 0.107      | 96.76                   | 96.97                   |
| 34     | 144,682,942     | 0.047      | 96.38                   | 97.06                   |
| 35     | 144,754,552     | 0.023      | 95.57                   | 97.14                   |
| 36     | 144,815,313     | 0.012      | 93.78                   | 97.22                   |
| 37     | 144,882,597     | 0.007      | 92.16                   | 97.30                   |
| 38     | 144,947,978     | 0.005      | 87.05                   | 97.37                   |
| 39     | 145,005,407     | 0.003      | 82.10                   | 97.44                   |
| 40     | 145,061,336     | 0.003      | 70.83                   | 97.50                   |
| total  | 3,029,822,774   | 25.798     | 97.57                   | 96.06                   |

¶ The expected proportion of spurious alignment assuming that all sequences have the maximum number of mismatches was calculated as  $1-(M/3)$  where  $M = m/l$  (see Materials and Methods), that is the maximum proportion of mismatches allowed in the alignment ( $m$ ) at a given length ( $l$ ). This is divided by 3 because three are all alternative non-reference alleles one of which is the hg19 reference. Using the ‘ancient’ parameters for alignment, 2 and 3 maximum mismatches are allowed for sequences of length 20-21 bp and 22-41 bp, respectively.

**Table S2. Summary of *S. cerevisiae* sequences.**

| Length | All unique seq. | Mapped (%) | Classified spurious (%) | Spurious expected (%) ¶ |
|--------|-----------------|------------|-------------------------|-------------------------|
| 20     | 459,775         | 97.256     | 97.52                   | 96.67                   |
| 21     | 459,707         | 92.031     | 98.07                   | 96.83                   |
| 22     | 459,977         | 98.445     | 97.31                   | 95.45                   |
| 23     | 459,995         | 97.035     | 97.26                   | 95.65                   |
| 24     | 459,923         | 90.983     | 97.41                   | 95.83                   |
| 25     | 460,129         | 76.067     | 97.33                   | 96.00                   |
| 26     | 460,119         | 52.633     | 97.14                   | 96.15                   |
| 27     | 460,133         | 29.795     | 97.25                   | 96.30                   |
| 28     | 460,172         | 14.895     | 97.33                   | 96.43                   |
| 29     | 460,180         | 7.040      | 97.48                   | 96.55                   |
| 30     | 460,196         | 3.459      | 97.47                   | 96.67                   |
| 31     | 460,366         | 1.855      | 97.20                   | 96.77                   |
| 32     | 460,274         | 1.112      | 95.79                   | 96.88                   |
| 33     | 460,383         | 0.770      | 96.73                   | 96.97                   |
| 34     | 460,360         | 0.564      | 97.56                   | 97.06                   |
| 35     | 460,401         | 0.428      | 91.11                   | 97.14                   |
| 36     | 460,351         | 0.357      | 91.18                   | 97.22                   |
| 37     | 460,473         | 0.286      | 97.67                   | 97.30                   |
| 38     | 460,584         | 0.231      | 100.00                  | 97.37                   |
| 39     | 460,510         | 0.208      | 94.44                   | 97.44                   |
| 40     | 460,584         | 0.160      | 90.00                   | 97.50                   |
| total  | 9,664,592       | 31.677     | 97.35                   | 96.09                   |

¶ Calculated as in Table S1.

**Table S3. Summary of *A. laibachii* sequences.**

| Length | All unique seq. | Mapped (%) | Classified spurious (%) | Spurious expected (%) ¶ |
|--------|-----------------|------------|-------------------------|-------------------------|
| 20     | 1,521,949       | 94.512     | 98.11                   | 96.67                   |
| 21     | 1,522,376       | 83.767     | 98.27                   | 96.83                   |
| 22     | 1,523,090       | 97.805     | 97.68                   | 95.45                   |
| 23     | 1,523,586       | 93.818     | 97.82                   | 95.65                   |
| 24     | 1,524,095       | 81.770     | 97.60                   | 95.83                   |
| 25     | 1,524,523       | 59.721     | 97.43                   | 96.00                   |
| 26     | 1,525,067       | 34.574     | 97.50                   | 96.15                   |
| 27     | 1,525,174       | 15.917     | 97.43                   | 96.30                   |
| 28     | 1,525,389       | 6.304      | 97.54                   | 96.43                   |
| 29     | 1,526,095       | 2.319      | 97.23                   | 96.55                   |
| 30     | 1,525,809       | 0.840      | 97.19                   | 96.67                   |
| 31     | 1,526,272       | 0.325      | 97.09                   | 96.77                   |
| 32     | 1,526,196       | 0.132      | 96.25                   | 96.88                   |
| 33     | 1,526,868       | 0.071      | 93.89                   | 96.97                   |
| 34     | 1,526,717       | 0.041      | 91.07                   | 97.06                   |
| 35     | 1,527,161       | 0.028      | 72.73                   | 97.14                   |
| 36     | 1,527,097       | 0.022      | 66.67                   | 97.22                   |
| 37     | 1,527,294       | 0.017      | 66.67                   | 97.30                   |
| 38     | 1,527,272       | 0.016      | 44.44                   | 97.37                   |
| 39     | 1,527,335       | 0.012      | NA                      | NA                      |
| 40     | 1,527,486       | 0.012      | 100.00                  | 97.50                   |
| total  | 32,036,851      | 27.200     | 97.68                   | 96.05                   |

¶ Calculated as in Table S1.

**Table S4. Percentage of sequences with a given number of mismatches for each type of alignments.**

| Alignment type | Sample                          | Number of mismatches |        |        |        |
|----------------|---------------------------------|----------------------|--------|--------|--------|
|                |                                 | 0                    | 1      | 2      | 3      |
| True           | Mezmaskaya 1                    | 0.00%                | 57.21% | 30.03% | 12.76% |
| True           | Modern human (negative control) | 0.07%                | 89.39% | 8.80%  | 1.74%  |
| Spurious       | Mezmaskaya 1                    | 0.25%                | 3.40%  | 24.48% | 71.87% |
| Spurious       | Bacteria (positive control)     | 0.12%                | 4.81%  | 30.05% | 65.02% |

**Table S5. Sequence length cutoffs in hominin ancient DNA studies.**

| Length (bp)   | References                                                                                                                                                                                                       |
|---------------|------------------------------------------------------------------------------------------------------------------------------------------------------------------------------------------------------------------|
| 25            | Malaspinas2014 [39], Raghavan2014 [40], Martiniano2016 [41]                                                                                                                                                      |
| 25,30¶        | Raghavan2015 [42]                                                                                                                                                                                                |
| 30            | Green2010 [16], Rasmussen2011 [43], Gamba2014 [44], Olalde2014 [45], Allentoft2015 [4], Gallego-Llorente2015 [46], Jones2015 [47], Olalde2015 [48], Rasmussen2015 [49], Hofmanova2016 [50]                       |
| 34            | Cassidy2016 [51]                                                                                                                                                                                                 |
| 35            | Meyer2012 [6], Fu2014 [52], Lazaridis2014 [53], Pruefer2014 [20], Skoglund2014 [54], Fu2015 [55], Guenther2015 [56], Meyer2016 [8], Pruefer2017 [21], Schlebusch2017 [57], Skoglund2017 [58], Hajdinjak2018 [59] |
| Not specified | Rasmussen2010 [60], Keller2012 [61], Rasmussen2014 [62], Seguin-Orlando2014 [63], Schiffels2016 [64], Sikora2017 [65]                                                                                            |

¶ A 25 bp length cutoff was applied to one of the two samples because a 30 bp cutoff would have reduced drastically the data for this sample. Only sequences without indels were considered.

**Table S6. Modern human contamination.** We used positions where three archaic high-coverage genomes (Denisova, Altai and Vindija33.19) are all homozygous for the ancestral allele and at least 90% of modern humans carry the derived allele(s). The estimates of contamination are reported with binomial 95% confidence intervals calculated using the number of contaminants (Nc) and the total number of sequences (Nt).

| SAMPLES        | <i>35bp</i>          |    |      | $L_{1\%}$            |     |      | $L_{10\%}$            |     |      |
|----------------|----------------------|----|------|----------------------|-----|------|-----------------------|-----|------|
|                | Estimate             | Nc | Nt   | Estimate             | Nc  | Nt   | Estimate              | Nc  | Nt   |
| SH Incisor     | 13.0%<br>(2.8-33.6%) | 3  | 23   | 13.0%<br>(2.8-33.6%) | 3   | 23   | 24.1%<br>(13.5-37.7%) | 13  | 54   |
| SH Femur frag. | 15.8%<br>(3.4-39.6%) | 3  | 19   | 13.0%<br>(2.8-33.6%) | 3   | 23   | 17.1%<br>(6.6-33.6%)  | 6   | 35   |
| SH Molar       | 0.0%<br>(0.0-97.5%)  | 0  | 1    | 0.0%<br>(0.0-97.5%)  | 0   | 1    | 33.3%<br>(0.8-90.6%)  | 1   | 3    |
| SH FemurXIII   | 50.0%<br>(6.8-93.2%) | 2  | 4    | NA¶                  | 0   | 0    | 50.0%<br>(6.8-93.2%)  | 2   | 4    |
| Mezmaiskaya1   | 2.6%<br>(1.9-3.3%)   | 59 | 2305 | 3.30%<br>(2.7-4.0%)  | 101 | 3041 | 3.5%<br>(2.9-4.7%)    | 108 | 3048 |

¶ No sequence that overlapped informative positions was longer than the cutoff  $L_{1\%} = 46$  bp for SH FemurXIII.

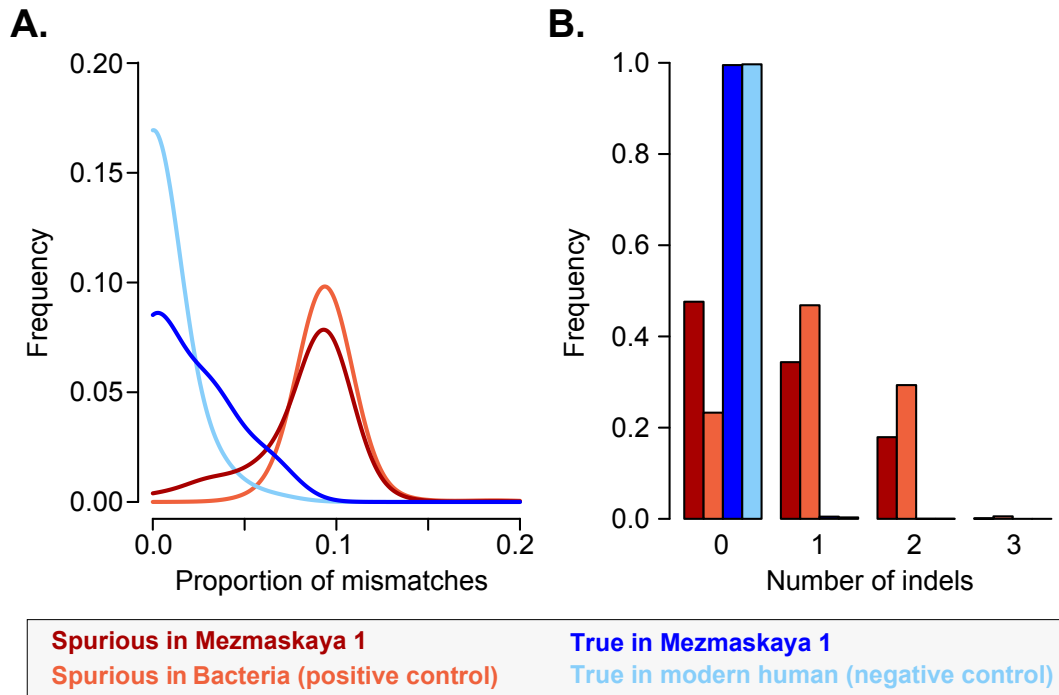

**Figure S1. Characteristics of spurious and true alignments.** Distributions of the proportion of mismatches (**A**) and distributions of the number of indels (**B**) for the spurious and true alignments detected in Mezmaskaya 1 (the same as in Figure 1C-D) and for the spurious and true alignments coming from the bacterial and the modern humans used as controls. The proportion of mismatches found in Mezmaskaya 1 (darkblue) are on average higher than in the modern human control (light blue) and this is due to the C-to-T changes as result of deamination in ancient samples. In Table S4 is reported the percentage of sequences having a given number of mismatches for each type of alignments.

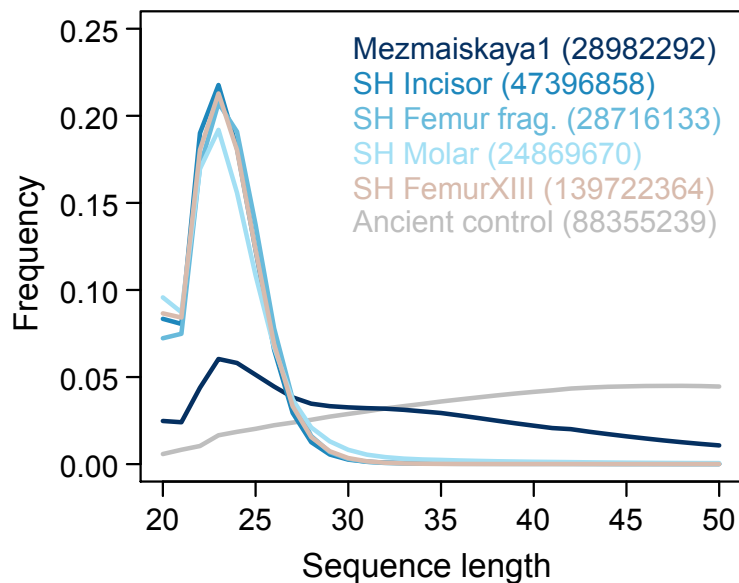

**Figure S2. Length distributions of mapped sequences.** The number in parentheses in the legend gives the total number of sapete come la penso.unique sequences of at least 20bp length. 57.1%, 99.5%, 99.7%, 97.0% and 99.2% sequences were shorter than 35 bp for Mezmaiskaya 1, SH Incisor, SH Femur fragment, SH Molar and SH Femur XIII, respectively.

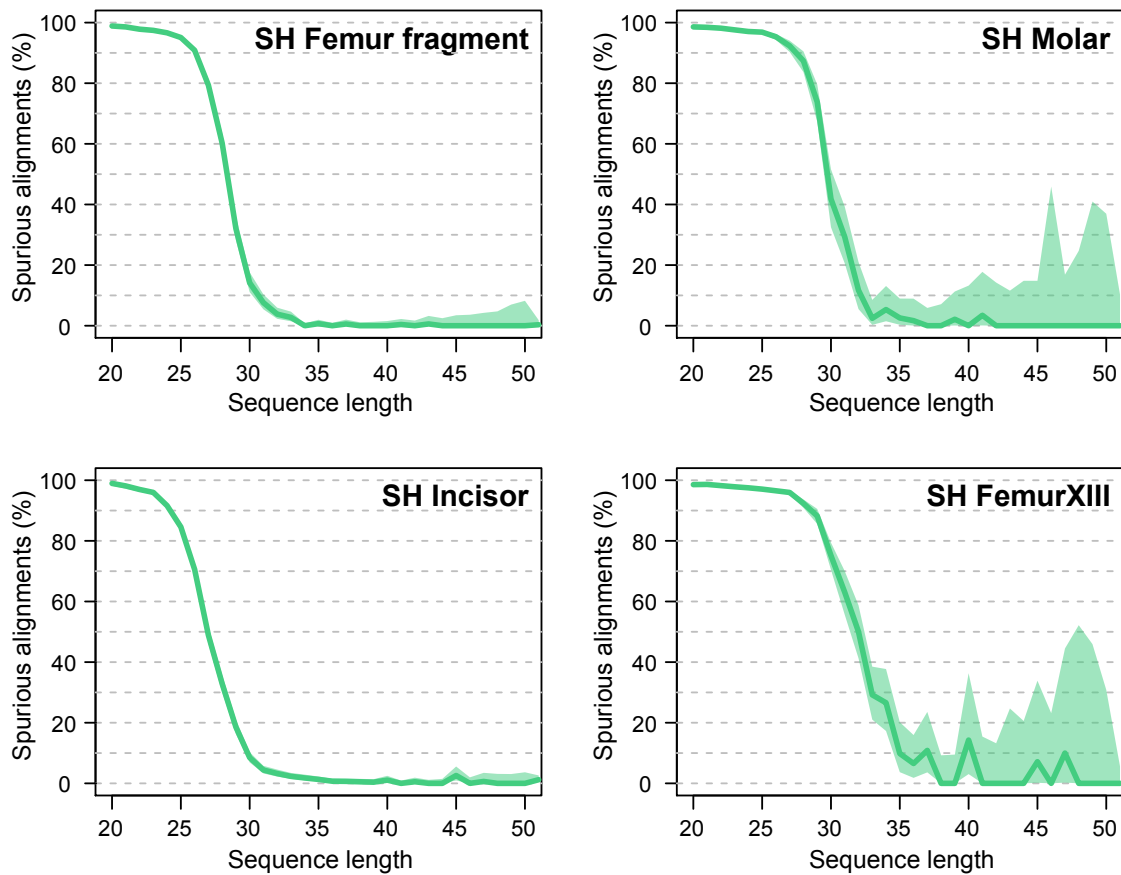

**Figure S3. Proportion of spurious alignments by sequence length for SH samples.** Proportion of spurious alignments by sequence length for SH samples. The filter “deam+indel” (see main text and Fig.2) was applied to all data. The line thickness shows the binomial 95% confidence interval. The point and confidence intervals at 51bp length show the estimates for sequences >50bp.

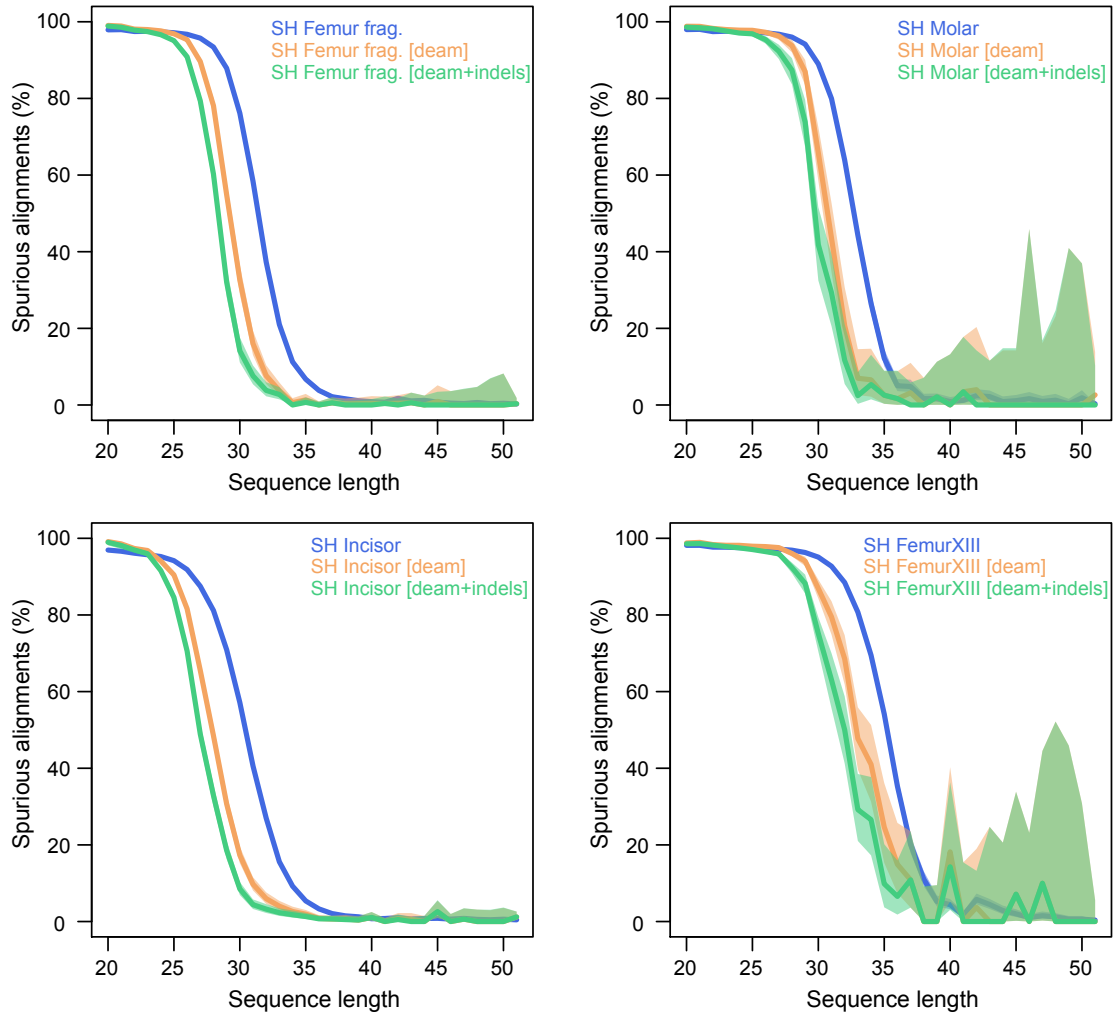

Figure S4. Spurious alignments in SH samples and the effect of different filters.

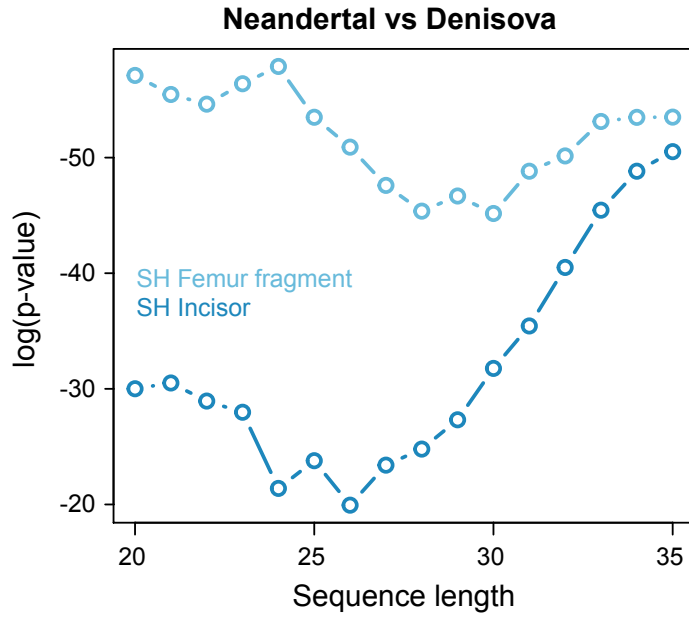

**Figure S5. Significance of Neandertal-lineage assignment for different minimum length cutoffs.** Fisher exact test p-values in log scale (y-axis) were calculated using read length cutoffs from 20 to 35 bp (x-axis) for the two SH samples (Femur fragment and Incisor) that were previously shown to be significantly closer to Neandertal than Denisova [8]. For the SH Femur fragment the lowest p-value is at 30 bp while for the SH Incisor is at 26 bp, corresponding to an overall percentage of spurious alignments of 2.5% and 15.6% for the two samples, respectively (see Fig. 3).

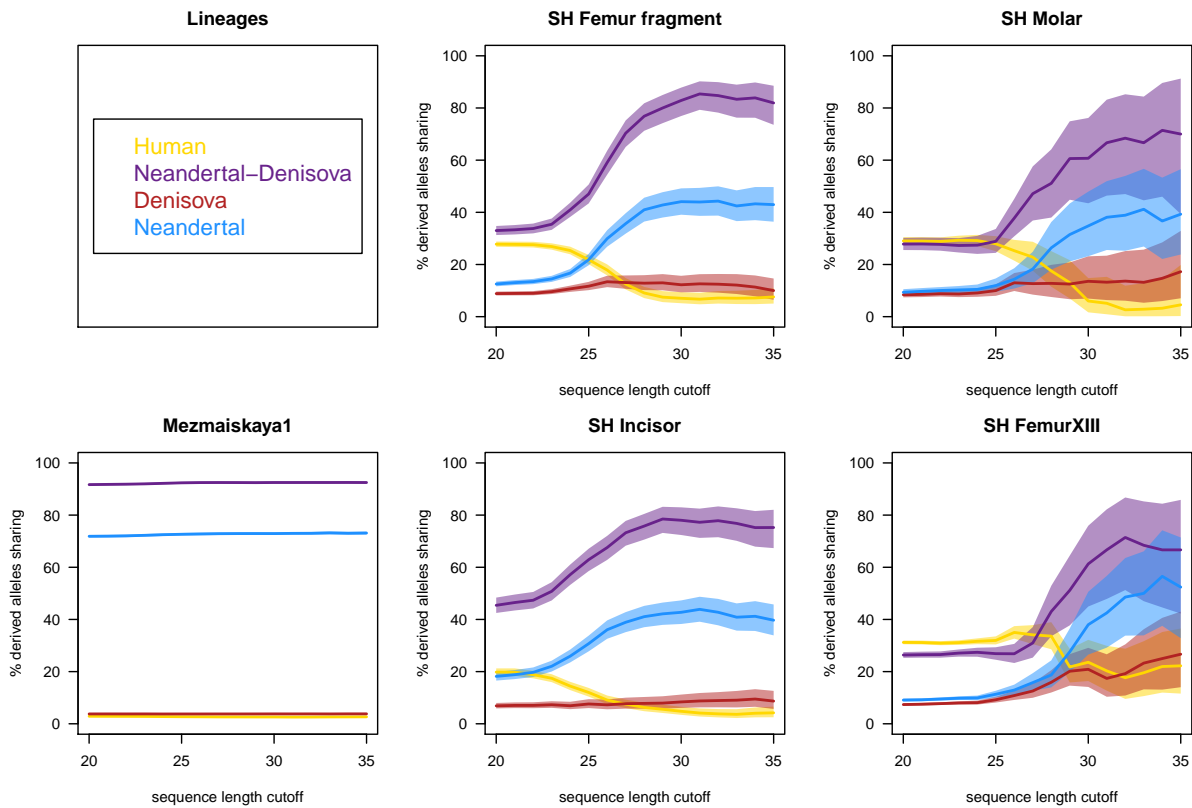

**Figure S6. Lineage assignment as a function of sequence length.** The percentage of derived allele sharing (y-axis) for four lineages (see legend on the top-left panel) is reported for each sequence length cutoff between 20 and 35 bp. Lines show point estimates and areas indicate 90% binomial confidence intervals.
